# Supplementary material for: Solar Powered Microplasma-Generated Ozone: Assessment of a Novel Point-of-Use Drinking Water Treatment Method
Source: MDPI journal article supplement (doi:10.3390/ijerph17061858), 2020-03-13
Supplement: s1 [file s1]

Supplemental Information

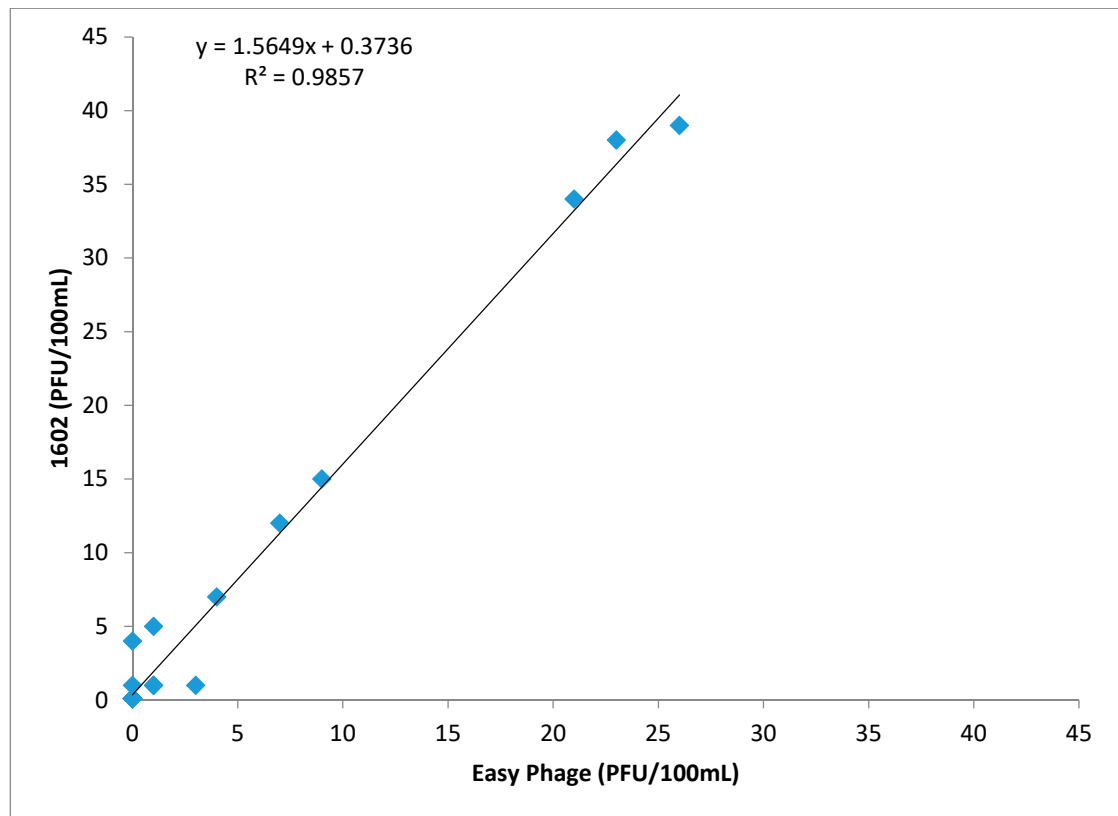

**Supplemental Information Figure S1:** Association between F+ coliphage measured using a simplified rapid method, and EPA method 1602.

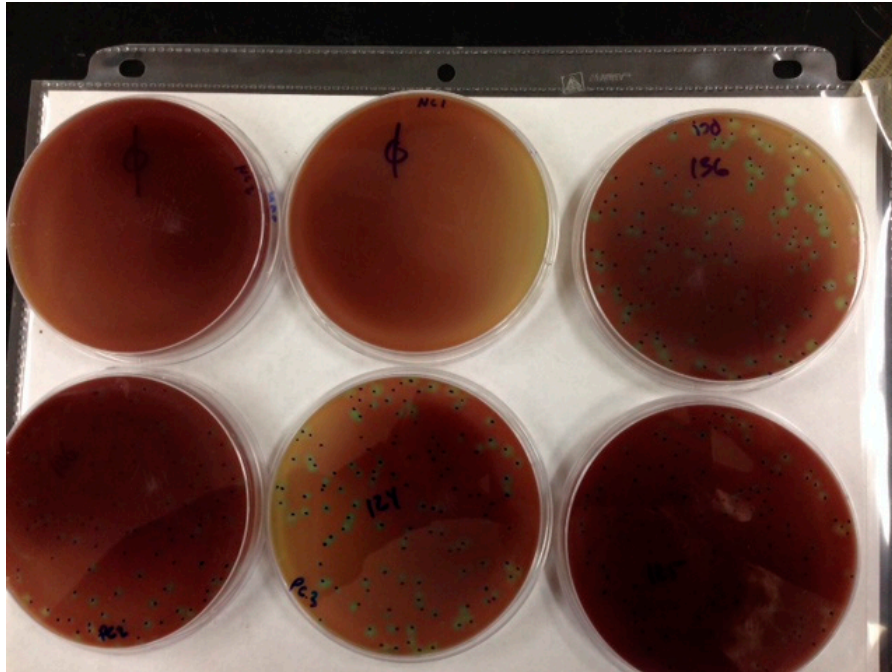

**Supplemental Information Figure S2:** Appearance of EasyPhage plates after 19 hours of incubation with positive (MS2) controls.

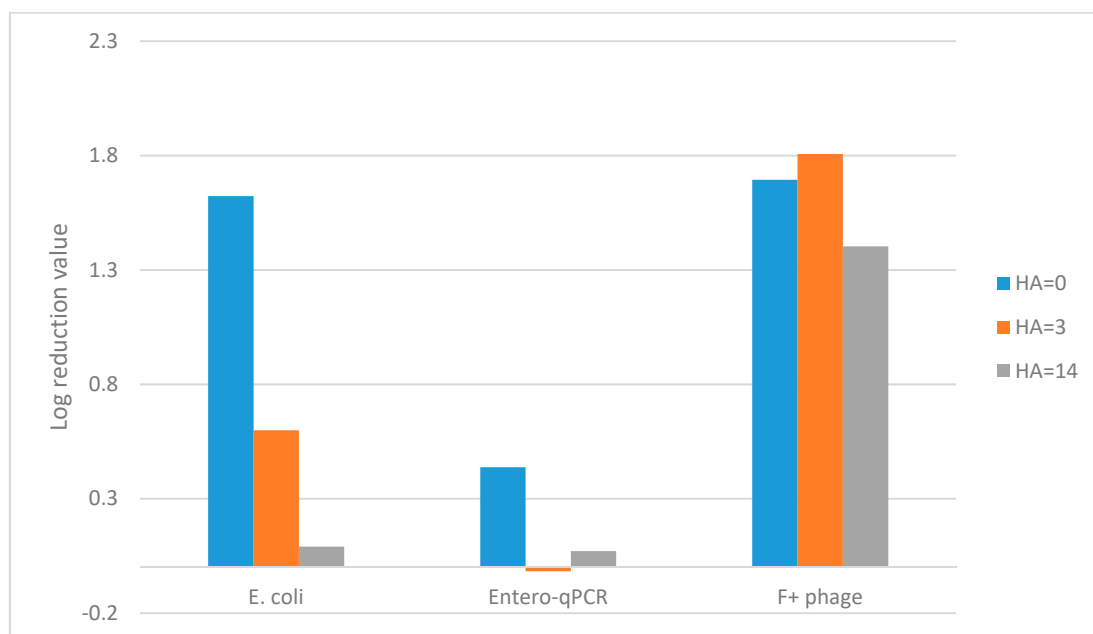

**Supplemental Information Figure S3:** Impact of humic acid on the reduction of indicator microbes at time=60 minutes, by ozonation. HA= indicates the mass of humic acid (in grams) added to 100L of treated water.
